# Supplementary material for: MASiVar: Multisite, Multiscanner, and Multisubject Acquisitions for Studying Variability in Diffusion Weighted Magnetic Resonance Imaging
Source: bioRxiv or medRxiv preprint supplement (doi:10.1101/2020.12.03.408567), 2021-05-26
Supplement: Supplementary file [file media-1.pdf]

## **MASiVar: Multisite, Multiscanner, and Multisubject Acquisitions for Studying Variability in Diffusion Weighted Magnetic Resonance Imaging**

Leon Y. Cai<sup>1</sup>, Qi Yang<sup>2</sup>, Praitayini Kanakaraj<sup>2</sup>, Vishwesh Nath<sup>2</sup>, Allen T. Newton<sup>3,4</sup>, Heidi A. Edmonson<sup>5</sup>, Jeffrey Luci<sup>6,7</sup>, Benjamin N. Conrad<sup>8,9</sup>, Gavin R. Price<sup>9</sup>, Colin B. Hansen<sup>2</sup>, Cailey I. Kerley<sup>2</sup>, Karthik Ramadass<sup>2</sup>, Fang-Cheng Yeh<sup>10</sup>, Hakmook Kang<sup>11</sup>, Eleftherios Garyfallidis<sup>12</sup>, Maxime Descoteaux<sup>13</sup>, Francois Rheault<sup>2,13</sup>, Kurt G. Schilling<sup>3,4</sup>, and Bennett A. Landman<sup>1,2,3,4</sup>

- <sup>1</sup> Department of Biomedical Engineering, Vanderbilt University, Nashville, TN, USA
- <sup>2</sup> Department of Electrical Engineering and Computer Science, Vanderbilt University, Nashville, TN, USA
- <sup>3</sup> Department of Radiology and Radiological Sciences, Vanderbilt University Medical Center, Nashville, TN, USA
- <sup>4</sup> Vanderbilt University Institute of Imaging Science, Vanderbilt University, Nashville, TN, USA
- <sup>5</sup> Department of Radiology, Mayo Clinic, Rochester, MN, USA
- <sup>6</sup> Department of Biomedical Engineering, The University of Texas at Austin, TX, USA
- <sup>7</sup> Department of Psychiatry, Robert Wood Johnson Medical School, Rutgers University, New Brunswick, New Jersey, USA
- <sup>8</sup> Neuroscience Graduate Program, Vanderbilt Brain Institute, Vanderbilt University Medical Center, Nashville, TN, USA
- <sup>9</sup> Department of Psychology and Human Development, Peabody College, Vanderbilt University, Nashville, TN, USA
- <sup>10</sup> Department of Neurological Surgery, University of Pittsburgh School of Medicine, Pittsburgh, PA, USA
- <sup>11</sup> Department of Biostatistics, Vanderbilt University Medical Center, Nashville, TN, USA
- <sup>12</sup> Department of Intelligent Systems Engineering, Indiana University, Bloomington, IN, USA
- <sup>13</sup> Department of Computer Science, Université de Sherbrooke, Sherbrooke, Québec, Canada

### **Supplementary Materials**

Supplementary Table 1 provides a list of the 43 white matter bundles investigated with the RecoBundles method and their abbreviations. Supplementary Figures 1 through 9 illustrate the region- and bundle-wise bootstrapped scan/re-scan discrepancies for additional analyses in the same vein as in Figure 4 in the manuscript.

**Supplementary Table 1.** List of 43 white matter bundles investigated with the RecoBundles method.

| <b>Name</b>                                  | <b>Abbreviation</b> |
|----------------------------------------------|---------------------|
| Arcuate Fasciculus (Left)                    | AF L                |
| Arcuate Fasciculus (Right)                   | AF R                |
| Frontal Aslant Tract (Left)                  | AST L               |
| Frontal Aslant Tract (Right)                 | AST R               |
| Cerebellum (Left)                            | CB L                |
| Cerebellum (Right)                           | CB R                |
| Corpus Callosum, Major Forceps               | CC ForcepsMajor     |
| Corpus Callosum, Minor Forceps               | CC ForcepsMinor     |
| Corpus Callosum, Full                        | CC                  |
| Corpus Callosum, Mid                         | CCMid               |
| Corticospinal Tract (Left)                   | CST L               |
| Corticospinal Tract (Right)                  | CST R               |
| Central Tegmental Tract (Left)               | CTT L               |
| Central Tegmental Tract (Right)              | CTT R               |
| Extreme Capsule (Left)                       | EMC L               |
| Extreme Capsule (Right)                      | EMC R               |
| Fronto-pontine Tract (Left)                  | FPT L               |
| Fronto-pontine Tract (Right)                 | FPT R               |
| Inferior Fronto-occipital Fasciculus (Left)  | IFOF L              |
| Inferior Fronto-occipital Fasciculus (Right) | IFOF R              |
| Inferior Longitudinal Fasciculus (Left)      | ILF L               |
| Inferior Longitudinal Fasciculus (Right)     | ILF R               |
| Middle Cerebellar Peduncle                   | MCP                 |
| Middle Longitudinal Fasciculus (Left)        | MdLF L              |
| Middle Longitudinal Fasciculus (Right)       | MdLF R              |
| Medial Longitudinal Fasciculus (Left)        | MLF L               |
| Medial Longitudinal Fasciculus (Right)       | MLF R               |
| Medial Lemniscus (Left)                      | ML L                |
| Medial Lemniscus (Right)                     | ML R                |
| Occipito-pontine Tract (Left)                | OPT L               |
| Occipito-pontine Tract (Right)               | OPT R               |
| Optic Radiation (Left)                       | OR L                |
| Optic Radiation (Right)                      | OR R                |
| Parieto-pontine Tract (Left)                 | PPT L               |
| Parieto-pontine Tract (Right)                | PPT R               |
| Superior Longitudinal Fasciculus (Left)      | SLF L               |
| Superior Longitudinal Fasciculus (Right)     | SLF R               |
| Spinothalamic Tract (Left)                   | STT L               |
| Spinothalamic Tract (Right)                  | STT R               |
| Temporo-pontine Tract (Left)                 | TPT L               |
| Temporo-pontine Tract (Right)                | TPT R               |
| Uncinate Fasciculus (Left)                   | UF L                |
| Uncinate Fasciculus (Right)                  | UF R                |

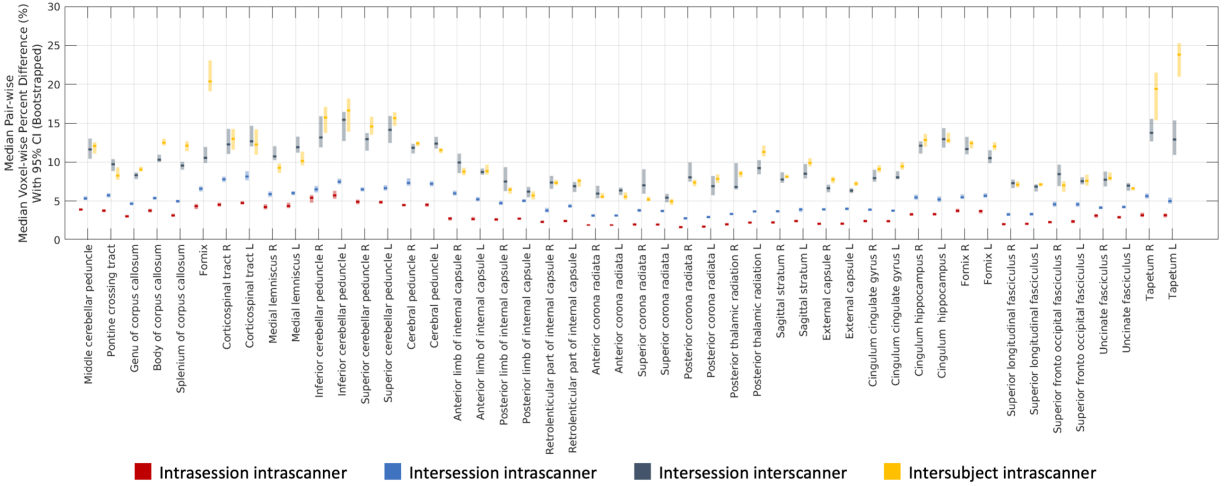

**Supplementary Figure 1.** Bootstrapped scan/re-scan discrepancies of MD across 48 Johns Hopkins white matter atlas regions.

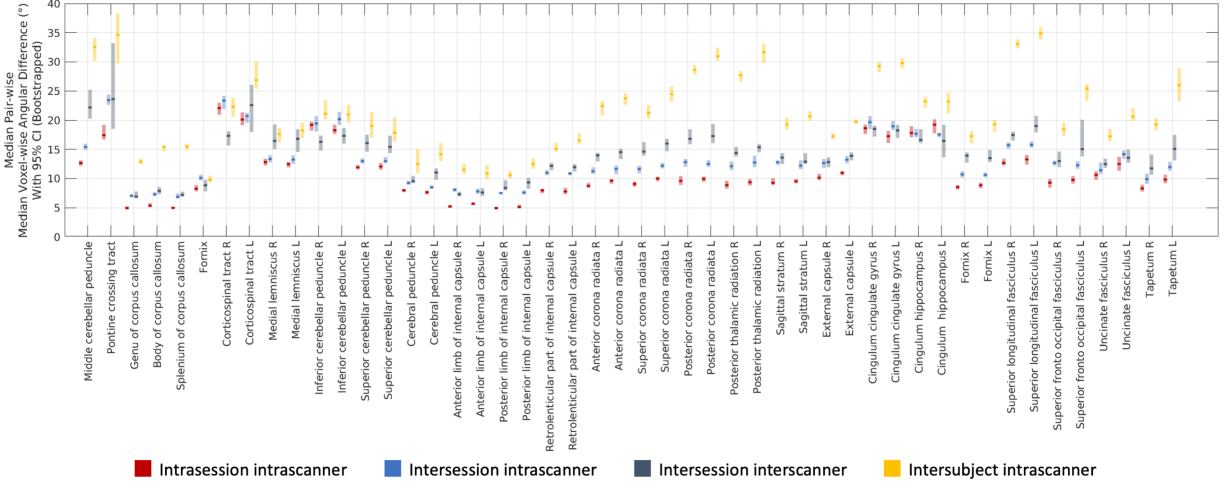

**Supplementary Figure 2.** Bootstrapped scan/re-scan discrepancies of V1 across 48 Johns Hopkins white matter atlas regions.

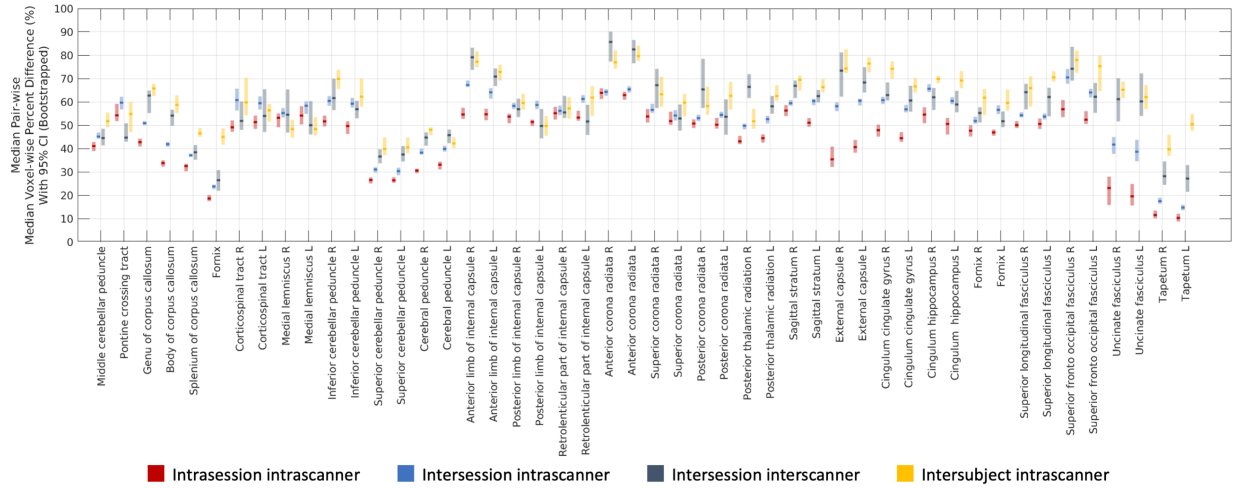

**Supplementary Figure 3.** Bootstrapped scan/re-scan discrepancies of cVF across 48 Johns Hopkins white matter atlas regions.

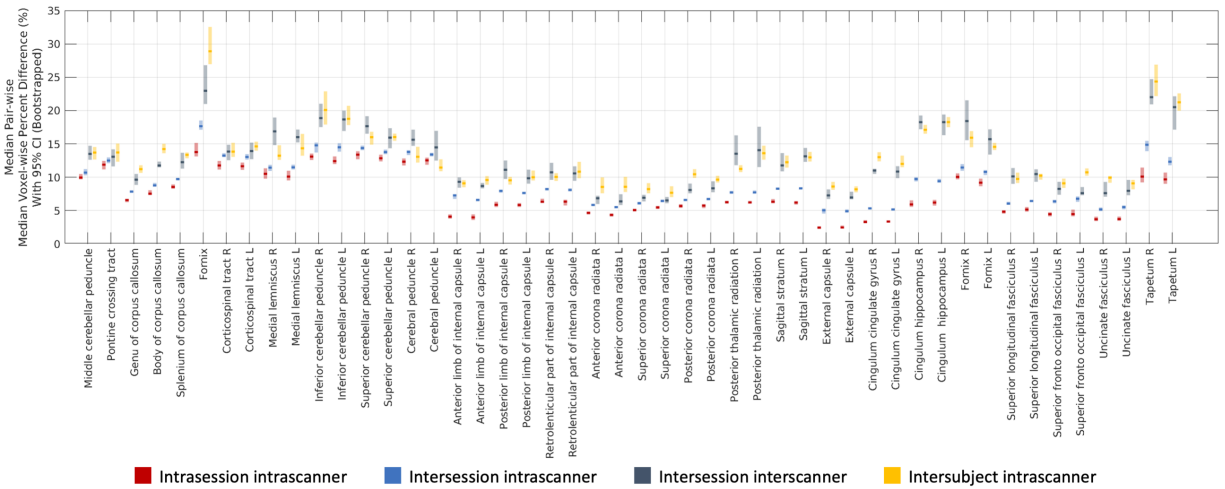

**Supplementary Figure 4.** Bootstrapped scan/re-scan discrepancies of iVF across 48 Johns Hopkins white matter atlas regions.

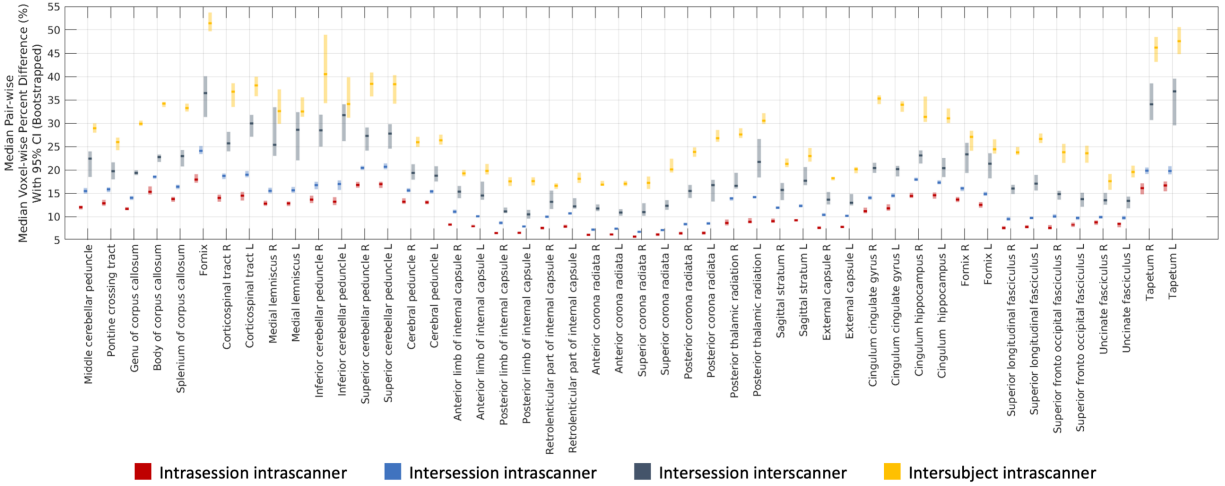

**Supplementary Figure 5.** Bootstrapped scan/re-scan discrepancies of ODI across 48 Johns Hopkins white matter atlas regions.

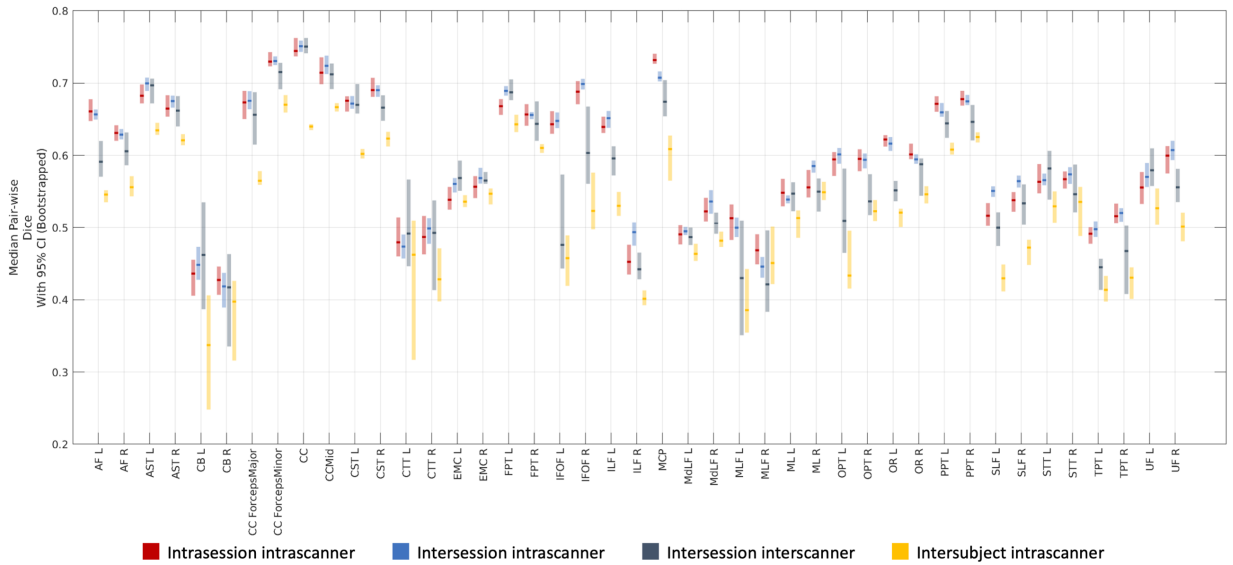

**Supplementary Figure 6.** Bootstrapped scan/re-scan discrepancies of bundle shape across 43 bundles identified with RecoBundles.

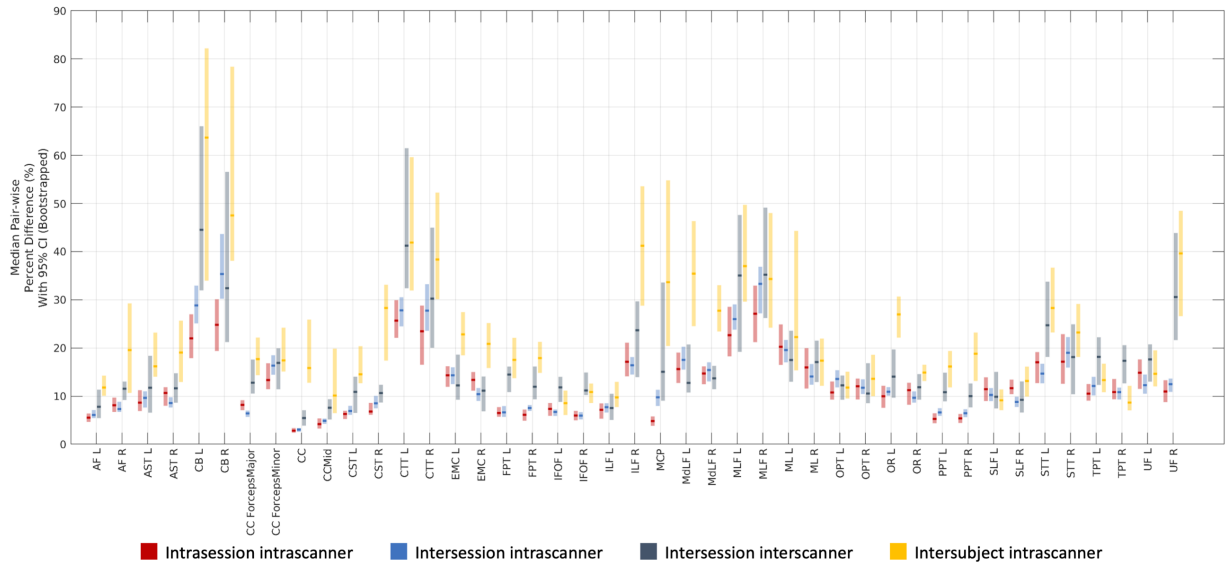

**Supplementary Figure 7.** Bootstrapped scan/re-scan discrepancies of bundle volume across 43 bundles identified with RecoBundles.

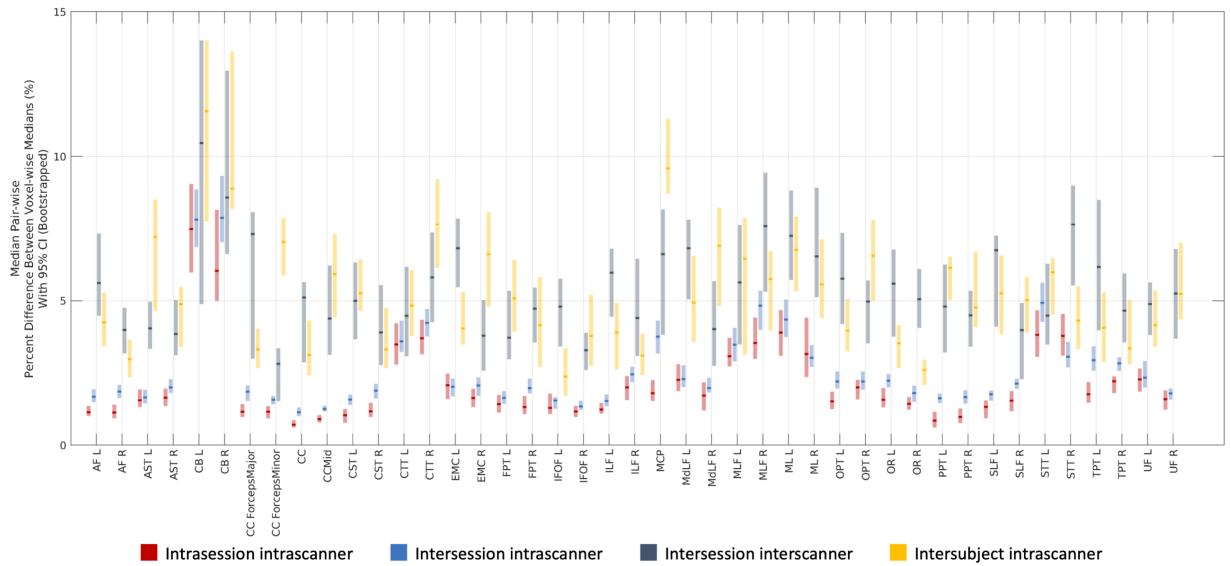

**Supplementary Figure 8.** Bootstrapped scan/re-scan discrepancies of bundle FA across 43 bundles identified with RecoBundles.

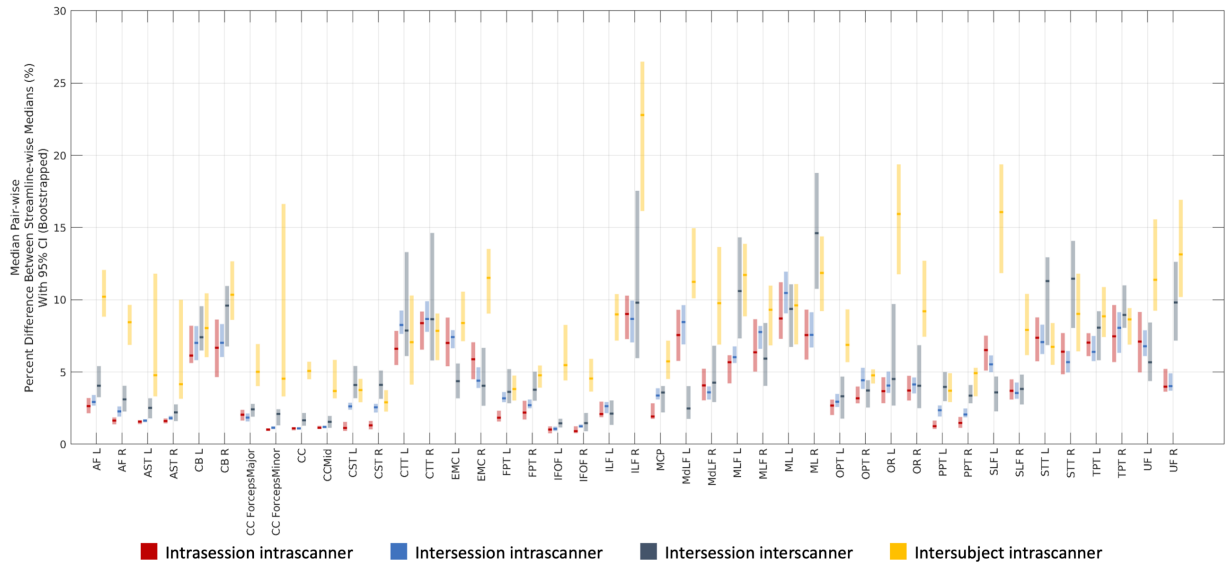

**Supplementary Figure 9.** Bootstrapped scan/re-scan discrepancies of bundle length across 43 bundles identified with RecoBundles.
